# Supplementary material for: Methoxycarbonyl trifluoromethyl disulfide, CH3OC(O)SSCF3: synthesis, structure and conformational properties
Source: Royal Society of Chemistry journal article supplement (doi:10.1039/b9nj00382g), 2010-01-01
Supplement: b9nj00382g.pdf [file b9nj00382g.pdf]

## Methoxycarbonyl Trifluoromethyl Disulfide, CH<sub>3</sub>OC(O)SSCF<sub>3</sub>: Synthesis, Structure and Conformational Properties

Sonia Torrico-Vallejos, Mauricio F. Erben, Roland Boese, Carlos O. Della Védova

### Electronic Supplementary Information (ESI)

**Table S1.** Experimental and calculated (B3LYP/6-311++G\*\*) vibrational data (cm<sup>-1</sup>) for CH<sub>3</sub>OC(O)SSCF<sub>3</sub>.

**Table S2.** Crystal data and structure refinement for CH<sub>3</sub>OC(O)SSCF<sub>3</sub>.

**Table S3.** Atomic coordinates ( x 10<sup>4</sup>) and equivalent isotropic displacement parameters (Å<sup>2</sup> x 10<sup>3</sup>) for CH<sub>3</sub>OC(O)SSCF<sub>3</sub>. U(eq) is defined as one third of the trace of the orthogonalized U<sub>ij</sub> tensor.

**Table S4.** Bond lengths [Å] and angles [°] for CH<sub>3</sub>OC(O)SSCF<sub>3</sub>.

**Table S5.** Anisotropic displacement parameters (Å<sup>2</sup> x 10<sup>3</sup>) for CH<sub>3</sub>OC(O)SSCF<sub>3</sub>. The anisotropic displacement factor exponent takes the form:  $-2\pi^2 [ h^2 a^{*2} U_{11} + \dots + 2 h k a^* b^* U_{12} ]$ .

**Table S6.** Hydrogen coordinates ( x 10<sup>4</sup> ) and i displacement parameters (Å<sup>2</sup> x 10<sup>3</sup>) for CH<sub>3</sub>OC(O)SSCF<sub>3</sub>.

**Table S6.** Hydrogen coordinates ( x 10<sup>4</sup> ) and i displacement parameters (Å<sup>2</sup> x 10<sup>3</sup>) for CH<sub>3</sub>OC(O)SSCF<sub>3</sub>.

**Table S7.** Torsion angles [°] for CH<sub>3</sub>OC(O)SSCF<sub>3</sub>.

Table S1.

| Experimental    |                 |                    | Calculated <sup>c</sup>   |                           | Assignment/<br>(Approximated description) <sup>f</sup> |
|-----------------|-----------------|--------------------|---------------------------|---------------------------|--------------------------------------------------------|
| Mode            | IR <sup>a</sup> | Raman <sup>b</sup> | B3LYP/6-311++G**          |                           |                                                        |
|                 |                 |                    | <i>s-s-g</i> <sup>d</sup> | <i>s-a-g</i> <sup>e</sup> |                                                        |
| v <sub>1</sub>  | 3014 vvw        | 3041 vvw           | 3173 (1)                  | 3174 (1)                  | v <sub>as</sub> (CH <sub>3</sub> )                     |
| v <sub>2</sub>  | 2967 w          | 2962 s             | 3140 (2)                  | 3141 (2)                  | v <sub>as</sub> (CH <sub>3</sub> )                     |
|                 | 2917            |                    |                           |                           | v <sub>4</sub> + v <sub>10</sub>                       |
| v <sub>3</sub>  | 2902 vvw        | 2896 vvw           | 3127 (2)                  |                           | v <sub>s</sub> (CH <sub>3</sub> ), <i>s-s-g</i>        |
|                 | 2849 vvw        | 2843 w             |                           | 3061 (5)                  | v <sub>s</sub> (CH <sub>3</sub> ), <i>s-a-g</i>        |
|                 | 2349            |                    |                           |                           | 2 x v <sub>10</sub>                                    |
| v <sub>4</sub>  | 1782 s          | 1762 vw            | 1821 (41)                 |                           | v(C=O), <i>s-s-g</i>                                   |
|                 | 1750 R          |                    |                           |                           |                                                        |
|                 | 1747 Q m        | 1724 vvw           |                           | 1788 (69)                 | v(C=O), <i>s-a-g</i>                                   |
|                 | 1743 P          |                    |                           |                           |                                                        |
| v <sub>5</sub>  |                 | 1493 m             | 1495 (2)                  | 1494 (2)                  | δ <sub>as</sub> (CH <sub>3</sub> )                     |
| v <sub>6</sub>  |                 |                    | 1484 (2)                  | 1484 (2)                  | δ <sub>as</sub> (CH <sub>3</sub> )                     |
| v <sub>7</sub>  | 1440 vw         | 1457 w             | 1467 (2)                  | 1467 (3)                  | δ <sub>s</sub> (CH <sub>3</sub> )                      |
| v <sub>8</sub>  |                 |                    | 1210 (19)                 | 1217 (59)                 | ρ <sub>s</sub> (CH <sub>3</sub> O)                     |
| v <sub>9</sub>  | 1297 vvw        |                    | 1167 (3)                  | 1186 (75)                 | ρ <sub>as</sub> (CH <sub>3</sub> )                     |
| v <sub>10</sub> | 1180 s          | 1158 vw            | 1165 (100)                | 1167 (< 1)                | v <sub>as</sub> (C–O–C)                                |
| v <sub>11</sub> | 1159 s          |                    | 1152 (24)                 | 1148 (46)                 | v <sub>as</sub> (CF <sub>3</sub> )                     |
| v <sub>12</sub> |                 |                    | 1139 (37)                 | 1138 (29)                 | v <sub>as</sub> (CF <sub>3</sub> )                     |
| v <sub>13</sub> | 1115 vs         | 1102 vvw           | 1090 (99)                 | 1088 (100)                | v <sub>s</sub> (CF <sub>3</sub> )                      |
| v <sub>14</sub> | 971 vvw         | 937 m              | 954 (1)                   | 966 (2)                   | v <sub>s</sub> (C–O–C)                                 |
| v <sub>15</sub> | 812 w           | 811 s              | 820 (7)                   | 825 (9)                   | δ(C–O–C)                                               |
| v <sub>16</sub> | 757 w           | 755 vs             | 749 (3)                   | 749 (3)                   | δ <sub>s</sub> (CF <sub>3</sub> )                      |
| v <sub>17</sub> | 671 vw          |                    | 675 (2)                   | 674 (2)                   | δ <sub>oop</sub> (O–C(O)S)                             |
| v <sub>18</sub> |                 | 568 w              | 558 (< 1)                 | 555 (< 1)                 | ρ(CF <sub>3</sub> )                                    |
| v <sub>19</sub> |                 |                    | 534 (< 1)                 | 534 (< 1)                 | δ <sub>s</sub> (CF <sub>2</sub> )                      |
| v <sub>20</sub> |                 | 541 m              | 516 (< 1)                 | 505 (< 1)                 | v(S–S)                                                 |
| v <sub>21</sub> |                 | 483 s              | 472 (2)                   | 446 (1)                   | v((O)C–S)                                              |
| v <sub>22</sub> |                 | 452 s              | 446 (2)                   | 437 (1)                   | v(S–CF <sub>3</sub> )                                  |

|                 |  |         |           |           |                                               |
|-----------------|--|---------|-----------|-----------|-----------------------------------------------|
| V <sub>23</sub> |  | 415 vvw | 371 (1)   | 387 (1)   | $\tau(\text{C-O-C-S})$                        |
| V <sub>24</sub> |  | 378 s   | 329 (1)   | 326 (< 1) | $\rho_{\text{as}}(\text{SCF}_3)$              |
| V <sub>25</sub> |  | 319 s   | 311 (2)   | 309 (< 1) | $\rho_{\text{as}}(\text{OCH}_3)$              |
| V <sub>26</sub> |  | 256 m   | 245 (1)   | 257 (2)   | $\tau(\text{C-O-C=O})$                        |
| V <sub>27</sub> |  | 152 m   | 167 (< 1) | 170 (< 1) | $\tau_{\text{oop}}(\text{C-O-C-S})$           |
| V <sub>28</sub> |  |         | 145 (< 1) | 146 (< 1) | $\rho(\text{CH}_3\text{-O})$                  |
| V <sub>29</sub> |  |         | 135 (< 1) | 132 (< 1) | $\tau(\text{CH}_3\text{-O})$                  |
| V <sub>30</sub> |  |         | 114 (< 1) | 113 (< 1) | $\rho(\text{CH}_3)$                           |
| V <sub>31</sub> |  | 79 m    | 59 (< 1)  | 59 (< 1)  | $\rho_{\text{s}}(\text{CH}_3 + \text{OC(O)})$ |
| V <sub>32</sub> |  |         | 45 (< 1)  | 45 (< 1)  | $\tau(\text{CF}_3)$                           |
| V <sub>33</sub> |  |         | 37 (< 1)  | 39 (< 1)  | $\rho(\text{SCF}_3)$                          |

<sup>a</sup> band intensity: vs = very strong, s = strong, m = medium, w = weak, vw = very weak, vvw = very very weak; <sup>b</sup> liquid at room temperature; <sup>c</sup> In parentheses relative band strengths for the two most stable forms, IR intensities [100%  $\equiv$  619 Km/mol for syn-syn-gauche form] and [100%  $\equiv$  512 Km/mol for syn-anti-gauche form]. <sup>d</sup> s-s-g refers to the most stable conformer syn-syn-gauche. <sup>e</sup> s-a-g refers to the second stable conformer syn-anti-gauche. <sup>f</sup> Except specified, bands in the spectra arise from vibration of both s-s-g and s-a-g forms.

**Table S2.**

|                                             |                                                                                                                                               |
|---------------------------------------------|-----------------------------------------------------------------------------------------------------------------------------------------------|
| Empirical formula                           | C <sub>3</sub> H <sub>3</sub> F <sub>3</sub> O <sub>2</sub> S <sub>2</sub>                                                                    |
| Formula weight                              | 192.17 Da                                                                                                                                     |
| Density (calculated)                        | 1.765 g cm <sup>-3</sup>                                                                                                                      |
| F(000)                                      | 384                                                                                                                                           |
| Temperature                                 | 190(2) K                                                                                                                                      |
| Crystal size                                | 0.3 mm diameter                                                                                                                               |
| Crystal color                               | colorless                                                                                                                                     |
| Crystal description                         | cylindric                                                                                                                                     |
| Wavelength                                  | 0.71073 Å                                                                                                                                     |
| Crystal system                              | triclinic                                                                                                                                     |
| Space group                                 | <i>P</i> $\bar{1}$                                                                                                                            |
| Unit cell dimensions                        | <i>a</i> = 6.4698(5) Å $\alpha$ = 97.219(6)°<br><i>b</i> = 9.0499(8) Å $\beta$ = 93.131(5)°<br><i>c</i> = 12.5700(11) Å $\gamma$ = 96.888(5)° |
| Volume                                      | 723.07(11) Å <sup>3</sup>                                                                                                                     |
| Z                                           | 4                                                                                                                                             |
| Cell measurement reflections used           | 9901                                                                                                                                          |
| Cell measurement theta min/max              | 2.28° to 27.03°                                                                                                                               |
| Diffractometer control software             | Bruker AXS APEX 2 Vers. 2.0-2 2006                                                                                                            |
| Diffractometer measurement device           | Siemens SMART three axis goniometer with APEX II area detector system                                                                         |
| Diffractometer measurement method           | Data collection strategy APEX 2/COSMO<br>chi +/- 10°                                                                                          |
| Theta range for data collection             | 1.64° to 27.90°                                                                                                                               |
| Completeness to theta = 27.90°              | 76.2 %                                                                                                                                        |
| Index ranges                                | -5<= <i>h</i> <=5, -11<= <i>k</i> <=11, 0<= <i>l</i> <=16                                                                                     |
| Computing data reduction                    | Bruker AXS APEX 2 Vers. 2.0-2 2006                                                                                                            |
| Absorption coefficient                      | 0.730 mm <sup>-1</sup>                                                                                                                        |
| Empirical absorption correction             | Bruker AXS TWINABS Vers. 1.05                                                                                                                 |
| Max. / min. transmission                    | 0.97 / 0.81                                                                                                                                   |
| R(merg) before/after correction             | 0.0534 / 0.0509                                                                                                                               |
| Computing structure solution                | Bruker AXS SHELXTL Vers. 6.12 W95/98/NT/2000/ME                                                                                               |
| Computing structure refinement              | Bruker AXS SHELXTL Vers. 6.12 W95/98/NT/2000/ME                                                                                               |
| Refinement method                           | Full-matrix least-squares on F <sup>2</sup>                                                                                                   |
| Reflections collected                       | 36644                                                                                                                                         |
| Independent reflections                     | 7516 [ <i>R</i> (int) = 0.069]                                                                                                                |
| Data / restraints / parameters              | 5296 / 0 / 184                                                                                                                                |
| Goodness-of-fit on F <sup>2</sup>           | 1.031                                                                                                                                         |
| Weighting details                           | $w = 1/[\sigma^2 (F_o^2) + (0.1365 * P)^2 + 0.2533 * P]$<br>where $P = (F_o^2 + 2F_c^2)/3$                                                    |
| Final R indices [ <i>I</i> >2σ( <i>I</i> )] | <i>R</i> 1 = 0.0631, <i>wR</i> 2 = 0.1900                                                                                                     |
| R indices (all data)                        | <i>R</i> 1 = 0.0887, <i>wR</i> 2 = 0.2186                                                                                                     |
| Extinction coefficient                      | 0.004(5)                                                                                                                                      |
| Largest diff. peak and hole                 | 0.563 and -0.357 eÅ <sup>-3</sup>                                                                                                             |

Table S3. Atomic coordinates ( $\times 10^4$ ) and equivalent isotropic displacement parameters ( $\text{\AA}^2 \times 10^3$ ) for oco<sub>ss</sub>\_m. U(eq) is defined as one third of the trace of the orthogonalized U<sub>ij</sub> tensor.

|     | x         | y        | z         | U(eq)  |
|-----|-----------|----------|-----------|--------|
| S11 | 2060 (2)  | 2230 (1) | 6248 (1)  | 45 (1) |
| S21 | -1058 (2) | 2159 (1) | 6255 (1)  | 47 (1) |
| O11 | -716 (4)  | 1558 (3) | 4130 (2)  | 52 (1) |
| O21 | -3897 (5) | 1672 (2) | 4771 (2)  | 48 (1) |
| C11 | 2795 (7)  | 4205 (4) | 6213 (3)  | 52 (1) |
| C21 | -1850 (7) | 1741 (3) | 4838 (2)  | 40 (1) |
| C31 | -4915 (7) | 1387 (4) | 3692 (3)  | 57 (1) |
| F11 | 2176 (5)  | 5056 (3) | 7044 (2)  | 94 (1) |
| F21 | 2056 (4)  | 4669 (3) | 5336 (2)  | 91 (1) |
| F31 | 4852 (4)  | 4463 (3) | 6252 (2)  | 73 (1) |
| S12 | 3799 (2)  | 8330 (1) | 1004 (1)  | 45 (1) |
| S22 | 6860 (2)  | 8198 (1) | 880 (1)   | 45 (1) |
| O12 | 5730 (4)  | 8116 (2) | -1219 (2) | 48 (1) |
| O22 | 9108 (5)  | 8059 (3) | -679 (2)  | 54 (1) |
| C12 | 2788 (6)  | 6365 (3) | 867 (3)   | 46 (1) |
| C22 | 7096 (7)  | 8113 (3) | -553 (2)  | 42 (1) |
| C32 | 9717 (7)  | 7959 (5) | -1781 (3) | 63 (1) |
| F12 | 795 (4)   | 6279 (2) | 1114 (2)  | 64 (1) |
| F22 | 2824 (4)  | 5674 (2) | -128 (2)  | 67 (1) |
| F32 | 3755 (4)  | 5597 (2) | 1511 (2)  | 72 (1) |

Table S4. Bond lengths [ $\text{\AA}$ ] and angles [ $^\circ$ ] for ocess\_m.

---

|             |             |             |             |
|-------------|-------------|-------------|-------------|
| S11-C11     | 1.801 (3)   | F21-C11-F31 | 107.9 (3)   |
| S11-S21     | 2.0110 (15) | F21-C11-F11 | 107.3 (3)   |
| S21-C21     | 1.806 (3)   | F31-C11-F11 | 107.4 (3)   |
| O11-C21     | 1.193 (4)   | F21-C11-S11 | 113.1 (3)   |
| O21-C21     | 1.316 (4)   | F31-C11-S11 | 108.2 (2)   |
| O21-C31     | 1.455 (4)   | F11-C11-S11 | 112.8 (3)   |
| C11-F21     | 1.314 (4)   | O11-C21-O21 | 128.5 (3)   |
| C11-F31     | 1.320 (5)   | O11-C21-S21 | 125.9 (3)   |
| C11-F11     | 1.328 (5)   | O21-C21-S21 | 105.6 (2)   |
| S12-C12     | 1.803 (3)   | C12-S12-S22 | 100.59 (13) |
| S12-S22     | 2.0116 (14) | C22-S22-S12 | 102.39 (15) |
| S22-C22     | 1.808 (3)   | C22-O22-C32 | 116.0 (3)   |
| O12-C22     | 1.185 (4)   | F32-C12-F22 | 107.3 (3)   |
| O22-C22     | 1.326 (4)   | F32-C12-F12 | 107.3 (3)   |
| O22-C32     | 1.455 (4)   | F22-C12-F12 | 107.8 (3)   |
| C12-F32     | 1.312 (4)   | F32-C12-S12 | 114.1 (3)   |
| C12-F22     | 1.329 (4)   | F22-C12-S12 | 112.8 (2)   |
| C12-F12     | 1.338 (4)   | F12-C12-S12 | 107.2 (2)   |
|             |             | O12-C22-O22 | 128.4 (3)   |
| C11-S11-S21 | 100.26 (15) | O12-C22-S22 | 126.6 (3)   |
| C21-S21-S11 | 101.71 (14) | O22-C22-S22 | 105.0 (2)   |
| C21-O21-C31 | 116.1 (3)   |             |             |

---

**Table S5.** Anisotropic displacement parameters ( $\text{\AA}^2 \times 10^3$ ) for  $\text{CH}_3\text{OC(O)SSCF}_3$ . The anisotropic displacement factor exponent takes the form:  $-2\pi^2 [ h^2 a^{*2} U_{11} + \dots + 2 h k a^* b^* U_{12} ]$

|     | U <sub>11</sub> | U <sub>22</sub> | U <sub>33</sub> | U <sub>23</sub> | U <sub>13</sub> | U <sub>12</sub> |
|-----|-----------------|-----------------|-----------------|-----------------|-----------------|-----------------|
| S11 | 39 (1)          | 51 (1)          | 47 (1)          | 10 (1)          | -1 (1)          | 11 (1)          |
| S21 | 40 (1)          | 67 (1)          | 33 (1)          | 5 (1)           | 7 (1)           | 4 (1)           |
| O11 | 46 (2)          | 73 (1)          | 36 (1)          | -2 (1)          | 8 (1)           | 9 (1)           |
| O21 | 34 (2)          | 65 (1)          | 43 (1)          | 4 (1)           | 1 (1)           | 3 (1)           |
| C11 | 34 (3)          | 55 (2)          | 68 (2)          | 11 (2)          | -1 (2)          | 7 (2)           |
| C21 | 45 (3)          | 41 (1)          | 34 (1)          | 5 (1)           | 4 (1)           | 2 (1)           |
| C31 | 54 (3)          | 65 (2)          | 48 (2)          | 5 (1)           | -8 (2)          | 1 (2)           |
| F11 | 83 (2)          | 66 (1)          | 126 (2)         | -23 (1)         | 29 (2)          | 8 (1)           |
| F21 | 78 (2)          | 78 (2)          | 121 (2)         | 58 (2)          | -27 (2)         | -8 (1)          |
| F31 | 43 (2)          | 78 (1)          | 92 (2)          | 6 (1)           | -1 (1)          | -3 (1)          |
| S12 | 43 (1)          | 42 (1)          | 50 (1)          | 0 (1)           | 9 (1)           | 10 (1)          |
| S22 | 38 (1)          | 61 (1)          | 34 (1)          | 4 (1)           | 0 (1)           | 1 (1)           |
| O12 | 45 (2)          | 62 (1)          | 37 (1)          | 8 (1)           | -4 (1)          | 7 (1)           |
| O22 | 34 (2)          | 84 (2)          | 45 (1)          | 14 (1)          | 7 (1)           | 10 (1)          |
| C12 | 35 (3)          | 48 (2)          | 52 (2)          | 2 (1)           | 5 (2)           | 3 (1)           |
| C22 | 50 (3)          | 39 (1)          | 38 (2)          | 7 (1)           | 3 (2)           | 5 (1)           |
| C32 | 54 (3)          | 84 (2)          | 52 (2)          | 8 (2)           | 20 (2)          | 6 (2)           |
| F12 | 34 (2)          | 76 (1)          | 80 (2)          | 7 (1)           | 10 (1)          | 0 (1)           |
| F22 | 67 (2)          | 61 (1)          | 66 (1)          | -17 (1)         | 11 (1)          | -4 (1)          |
| F32 | 62 (2)          | 63 (1)          | 95 (2)          | 35 (1)          | -4 (1)          | 9 (1)           |

**Table S6.** Hydrogen coordinates (  $\times 10^4$  ) and i displacement parameters ( $\text{\AA}^2 \times 10^3$ ) for  $\text{CH}_3\text{OC(O)SSCF}_3$ .

|      | x     | y    | z     | U(eq) |
|------|-------|------|-------|-------|
| H3A1 | -4359 | 2134 | 3262  | 85    |
| H3B1 | -6387 | 1427 | 3744  | 85    |
| H3C1 | -4697 | 408  | 3358  | 85    |
| H3A2 | 8861  | 7130 | -2209 | 94    |
| H3B2 | 11158 | 7792 | -1787 | 94    |
| H3C2 | 9546  | 8871 | -2078 | 94    |



**Table S7.** Torsion angles [°] for CH<sub>3</sub>OC(O)SSCF<sub>3</sub>.

---

|                 |             |
|-----------------|-------------|
| C11-S11-S21-C21 | 92.74 (15)  |
| S21-S11-C11-F21 | -63.2 (3)   |
| S21-S11-C11-F31 | 177.4 (2)   |
| S21-S11-C11-F11 | 58.7 (3)    |
| C31-O21-C21-O11 | -2.4 (4)    |
| C31-O21-C21-S21 | 178.2 (2)   |
| S11-S21-C21-O11 | 0.5 (3)     |
| S11-S21-C21-O21 | 179.87 (16) |
| C12-S12-S22-C22 | 89.37 (14)  |
| S22-S12-C12-F32 | 51.1 (3)    |
| S22-S12-C12-F22 | -71.7 (3)   |
| S22-S12-C12-F12 | 169.81 (19) |
| C32-O22-C22-O12 | -1.5 (4)    |
| C32-O22-C22-S22 | 179.0 (2)   |
| S12-S22-C22-O12 | -0.9 (3)    |
| S12-S22-C22-O22 | 178.56 (16) |

---
